# Supplementary material for: High Risk of Sustained Ventricular Arrhythmia Recurrence After Acute Myocarditis
Source: PubMed Central journal article supplement (PMC7141537; doi:10.3390/jcm9030848), 2020-03-20
Supplement: jcm-09-00848-s001.pdf [file jcm-09-00848-s001.pdf]

| ICD-10 Diagnostic codes                                                                                                                                                                                                                                                                                                                                                                                                                                                                                                                                                                                                                                                       | CCMP Procedure codes                                                                                                                                                                                                                                                                                                                                                                                                                                                                                                                                                                                                                                                                                                                                                                                                                                                                                                                                                                                                                                                                                                                                                                                                                                                           |
|-------------------------------------------------------------------------------------------------------------------------------------------------------------------------------------------------------------------------------------------------------------------------------------------------------------------------------------------------------------------------------------------------------------------------------------------------------------------------------------------------------------------------------------------------------------------------------------------------------------------------------------------------------------------------------|--------------------------------------------------------------------------------------------------------------------------------------------------------------------------------------------------------------------------------------------------------------------------------------------------------------------------------------------------------------------------------------------------------------------------------------------------------------------------------------------------------------------------------------------------------------------------------------------------------------------------------------------------------------------------------------------------------------------------------------------------------------------------------------------------------------------------------------------------------------------------------------------------------------------------------------------------------------------------------------------------------------------------------------------------------------------------------------------------------------------------------------------------------------------------------------------------------------------------------------------------------------------------------|
| <ul style="list-style-type: none"> <li>- I01.2 Acute rheumatic myocarditis</li> <li>- I09.0 Rheumatic myocarditis</li> <li>- I40.0 Infective myocarditis</li> <li>- I40.1 Isolated myocarditis</li> <li>- I40.8 Other acute myocarditis</li> <li>- I40.9 Acute myocarditis, unspecified</li> <li>- I41.0 Myocarditis in bacterial diseases classified elsewhere</li> <li>- I41.1 Myocarditis in viral diseases classified elsewhere</li> <li>- I41.2 Myocarditis in infectious and parasitic diseases classified elsewhere</li> <li>- I41.8 Myocarditis in diseases classified elsewhere</li> <li>- I51.4 Myocarditis, unspecified</li> <li>- B33.2 Viral carditis</li> </ul> | <ul style="list-style-type: none"> <li>- DELF013 Implantation of an Implantable Cardioverter-Defibrillator, with placement of a right intraventricular lead by transcutaneous venous route</li> <li>- DELF020 Implantation of an Implantable Cardioverter-Defibrillator, with insertion of a right intraventricular lead and a lead into a left cardiac vein by transcutaneous venous route</li> <li>- DELF014 Implantation of an Implantable Cardioverter-Defibrillator, with insertion of a right intraventricular and intraventricular lead, and a lead into a left cardiac vein by transcutaneous venous route</li> <li>- DELF016 Implantation of an Implantable Cardioverter-Defibrillator without atrial defibrillation, with insertion of an intraatrial lead and a right intraventricular lead by transcutaneous venous route</li> <li>- DELF900 Implantation of an Implantable Cardioverter-Defibrillator with atrial defibrillation, with insertion of an intraatrial lead and a right intraventricular lead by transcutaneous venous route</li> <li>- DELA004 Implantation of an Implantable Cardioverter-Defibrillator with direct access implantation of an epicardiac electrode</li> <li>- DELA007 Implantation of a cardiac defibrillation generator</li> </ul> |

**Supplementary Figure 1.** International Classification of Diseases (ICD-10) diagnostic codes for myocarditis and Common Classification of Medical Procedures (Classification Commune des Actes Medicaux, CCAM) codes for the implant of a defibrillator.
